# Supplementary material for: A positive feedback between IDO1 metabolite and COL12A1 via MAPK pathway to promote gastric cancer metastasis
Source: PubMed Central journal article supplement (PMC6637527; doi:10.1186/s13046-019-1318-5), 2019-07-17

SGC-7901

0 $\mu$ M

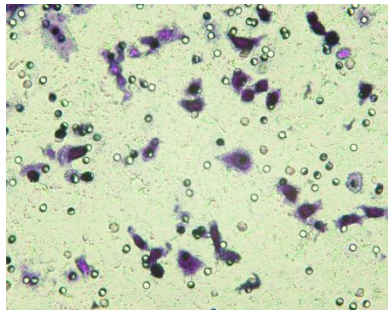

1 $\mu$ M

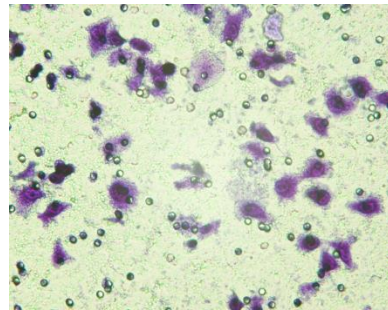

10 $\mu$ M

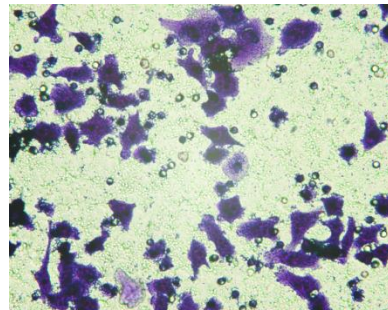

100 $\mu$ M

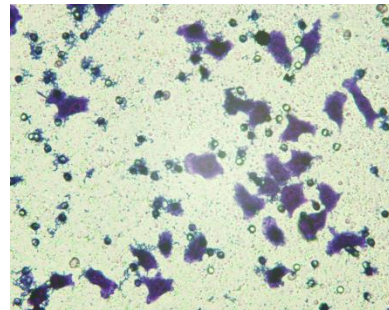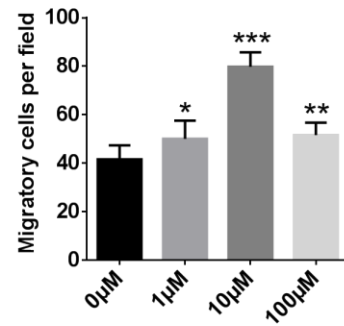

HGC-27

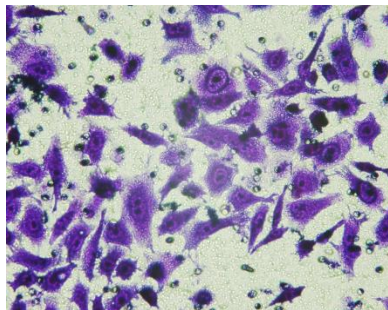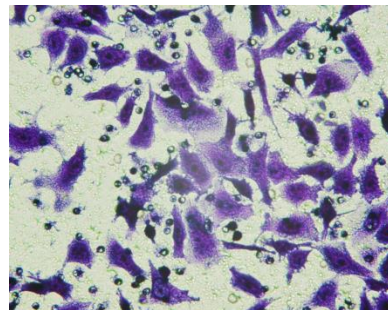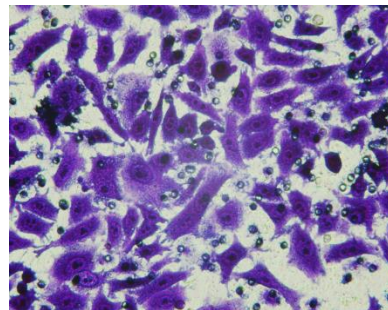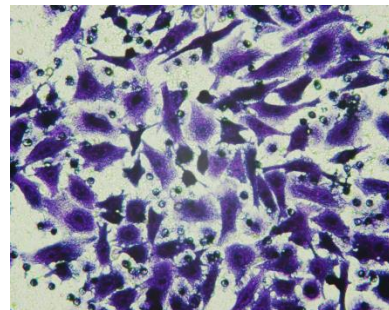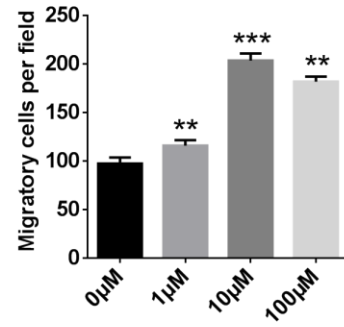

Supplement: 13046_2019_1318_MOESM6_ESM.pdf [file 13046_2019_1318_MOESM6_ESM.pdf]
